# Supplementary material for: Technical Performance Assessment of Robotic Surgery: A Systematic Scoping Review
Source: Research Square preprint supplement (doi:10.21203/rs.3.rs-7080528/v1), 2025-07-18
Supplement: Supplementary file 1 [file 9f0fc09215c09734d95a7c93.xlsx]

## Sheet: Article information
Supplementary File
Article title	Technical Performance Assessment of Robotic Surgery: A Systematic Scoping Review
Journal name	Journal of Robotic Surgery
Author names	Seyed Mohammad Kalantar Motamedi[1], Sahar Fatima[2], Qian Zhang[3,4], Margaret J. Foster[5], Jacob M. Kolman[6,7], Raaghav Bageshwar[8], James L. Lilly[8], Peter K. Lin[8], Adriana Lopez[3], Stephen L. Jones[3], Gyusung I. Lee[9], Ganesh Sankaranarayanan[10], Farzan Sasangohar[2,3,7], Dimitrios Stefanidis[1], Randolph H. Steadman[2]
Affliliations	1 Department of Surgery, Indiana University School of Medicine, Indianapolis, IN, USA
	2 Department of Anesthesiology & Critical Care, Houston Methodist, Houston, TX, USA
	3 Center for Health Data Science and Analytics, Houston Methodist, Houston, TX, USA
	4 Department of Engineering, College of Charleston, Charleston, SC, USA (present address)
	5 Department of Medical Education, School of Medicine, and Center for Systematic Reviews and Research Syntheses, University Libraries, Texas A&M University, College Station, TX, USA
	6 Academic Affairs, Houston Methodist, Houston, TX, USA
	7 Wm Michael Barnes '64 Department of Industrial and Systems Engineering, Texas A&M University, College Station, TX, USA
	8 School of Engineering Medicine (EnMed), Texas A&M University College of Medicine, Texas A&M College of Engineering and Houston Methodist Hospital, Houston, TX, USA
	9 Division of Education, American College of Surgeons, Chicago, IL, USA
	10 Department of Surgery, The University of Texas Southwestern Medical Center, Dallas, TX, USA
Correspondence	Randolph H. Steadman. 6565 Fannin St, B452, Houston, TX 77030 rsteadman@houstonmethodist.org. Phone: 713-441-3492.

## Sheet: Medline Ovid
Robotic Surgery, medline search version 2, 5/19/22
concept	search line	terms	results
robot surgery	1	exp Robotic Surgical Procedures/	12909
	2	(robot* adj2 surger*).ti,ab,kw.	8988
	3	1 or 2	17973
	4	exp specialties, surgical/ or exp general surgery/	212814
	5	(surgical or surgery or surgeries).ti,ab,kw.	1977521
	6	exp robotics/	35578
	7	robot*.ti,ab,kw.	58918
	8	(4 or 5) and (6 or 7)	25868
	9	3 or 8	29300
Types of surgeries	10	((digestive or gastro* or urolog* or abdominal or gynecol* or thoraic or urogen* or bariat*) adj2 surger*).ti,ab.	54455
	11	exp bariatric surgery/ or digestive system surgical procedures/ or gastrectomy/ or exp gastroenterostomy/ or exp gastropexy/ or exp gastroplasty/ or exp gastrostomy/ or urogenital surgical procedures/ or exp Gynecologic Surgical Procedures/ or exp Urologic Surgical Procedures/ or exp Thoracic Surgery/ or exp urogenital surgical procedures/ or exp urologic surgical procedures/ or exp wound closure…	509661
	12	10 or 11	539910
study type, question, outcome	13	(skill* or competence*).ti,ab.	283124
	14	error*.ti,ab,kw.	346546
	15	(performance adj2 (metric* or evaluat* or assess*)).ti,ab,kw.	32989
	16	exp Medical Errors/	119871
	17	exp Clinical Competence/	101944
	18	or/13-17	808777
all 3 concepts	19	9 and 12 and 18	804
limiters	20	limit 19 to yr="2012 -Current"	595

## Sheet: Embase Ovid
Robotic Surgery, medline search version 2, 5/19/22
concept	search line	terms	results
robotic surgery	1	exp robot assisted surgery/	17557
	2	(robot* adj2 surger*).ti,ab,kw.	15066
	3	1 or 2	26024
	4	exp general surgery/	18335
	5	(surgical or surgery or surgeries).ti,ab,kw.	2678547
	6	exp robotics/	44098
	7	robot*.ti,ab,kw.	88749
	8	(4 or 5) and (6 or 7)	46500
	9	3 or 8	52361
types of surgeries	10	((digestive or gastro* or urolog* or abdominal or gynecol* or thoraic or urogen* or bariat*) adj2 surger*).ti,ab.	86649
	11	stomach surgery/ or exp gastrectomy/ or gastroenterostomy/ or gastropexy/ or gastroplasty/ or gastrostomy/ or exp bariatric surgery/ or surgery/ or exp abdominal surgery/ or exp thorax surgery/ or exp urologic surgery/ or wound closure techniques/	2451895
	12	10 or 11	2463890
study type, question, outcome	13	(skill* or competence*).ti,ab.	370337
	14	error*.ti,ab,kw.	447336
	15	(performance adj2 (metric* or evalut* or assess*)).ti,ab,kw.	44163
	16	exp medical error/	156726
	17	exp clinical competence/	66100
	18	or/13-17	1011000
all 3 concepts	19	9 and 12 and 18	2730
limiters	20	limit 19 to yr="2012 -Current"	2156

## Sheet: compendex
	Compendex (IE)
	((((((robot* and surger*) WN ALL) AND (((digestive or gastro* or urolog* or abdominal or gynecol* or thoraic or urogen* or bariat*) and surger*) WN ALL)) AND ((skill* or competence* or error* or (performance and (metric* or evaluat* or assess*))) WN ALL))) AND ((2022 OR 2021 OR 2020 OR 2019 OR 2018 OR 2017 OR 2016 OR 2015 OR 2014 OR 2013 OR 2012) WN YR))
	321 results
	290 without book chapters

## Sheet: List of included results
Study ID	Title	Year of publication	Study ID (DOI or PMID)
Guru 2015	Cognitive skills assessment during robot-assisted surgery: separating the wheat from the chaff	2015	10.1111/bju.12657
Vaccaro 2013	Robotic virtual reality simulation plus standard robotic orientation versus standard robotic orientation alone: A randomized controlled trial	2013	10.1097/SPV.0b013e3182a09101
Nisky 2013	Kinematic analysis of motor performance in robot-assisted surgery: A preliminary study	2013	10.3233/978-1-61499-209-7-302
Nisky 2015	Teleoperated versus open needle driving: Kinematic analysis of experienced surgeons and novice users	2015	10.1109/ICRA.2015.7139949
Shafiei 2017	Motor skill evaluation during robot-assisted surgery	2017	10.1115/DETC2017-67607
Sharon 2021	Rate of Orientation Change as a New Metric for Robot-Assisted and Open Surgical Skill Evaluation	2021	10.1109/TMRB.2021.3073209
Kiyasseh 2022	Quantification of Robotic Surgeries with Vision-Based Deep Learning	2022	10.48550/arXiv.2205.03028
Hutchinson 2021	Analysis of executional and procedural errors in dry-lab robotic surgery experiments	2022	10.1002/rcs.2375
Wu 2021	Sensor-based indicators of performance changes between sessions during robotic surgery training	2021	10.1016/j.apergo.2020.103251
Goldenberg 2017	Feasibility of expert and crowd-sourced review of intraoperative video for quality improvement of intracorporeal urinary diversion during robotic radical cystectomy	2017	10.5489/cuaj.4442
Khan 2019	Use of Robotic Anastomosis Competency Evaluation (RACE) tool for assessment of surgical competency during urethrovesical anastomosis	2019	10.5489/cuaj.5348
Almarzouq 2020	Are basic robotic surgical skills transferable from the simulator to the operating room? A randomized, prospective, educational study	2020	10.5489/cuaj.6460
Willuth 2022	Robotic-assisted cholecystectomy is superior to laparoscopic cholecystectomy in the initial training for surgical novices in an ex vivo porcine model: a randomized crossover study	2022	10.1007/s00464-021-08373-6
Jarocki 2022	Validity of robotic simulation for high-stakes examination: a pilot study	2022	10.1007/s11701-021-01258-9
Gergen 2022	Introduction of robotic surgery does not negatively affect cardiothoracic surgery resident experience	2022	10.1007/s11701-021-01255-y
Addison 2022	Blinded intraoperative skill evaluations avoid gender-based bias	2022	10.1007/s00464-022-09142-9
Brown 2020	How to bring surgery to the next level: Interpretable skills assessment in robotic-assisted surgery	2020	10.1159/000512437
Raison 2021	Procedural virtual reality simulation training for robotic surgery: a randomised controlled trial	2021	10.1007/s00464-020-08197-w
VanAmsterdam 2022	Gesture Recognition in Robotic Surgery with Multimodal Attention	2022	10.1109/TMI.2022.3147640
Butterworth 2021	Assessment of the training program for Versius, a new innovative robotic system for use in minimal access surgery	2021	10.1136/bmjsit-2020-000057
Belotto 2022	INFLUENCE OF MINIMALLY INVASIVE LAPAROSCOPIC EXPERIENCE SKILLS ON ROBOTIC SURGERY DEXTERITY	2021	10.1590/0102-672020210003e1604
Kanitra 2021	Transference of skills in robotic vs. laparoscopic simulation: a randomized controlled trial	2021	10.1186/s12893-021-01385-y
Levy 2021	Development of the fundamentals of thoracic robotic surgery curriculum	2021	10.21037/jtd-2019-rts-02
Ghazanfar 2021	Is laparoscopic experience helpful in simulator based robotic training in general surgery?	2021	10.47391/JPMA.05-779
Cowan 2021	Virtual Reality vs Dry Laboratory Models: Comparing Automated Performance Metrics and Cognitive Workload during Robotic Simulation Training	2021	10.1089/end.2020.1037
Umemura 2021	An innovative tissue model for robot-assisted radical hysterectomy and pelvic lymphadenectomy	2021	10.31083/j.ejgo.2021.03.2295
Zwart 2021	Added value of 3D-vision during robotic pancreatoduodenectomy anastomoses in biotissue (LAEBOT 3D2D): a randomized controlled cross-over trial	2021	10.1007/s00464-020-07732-z
Beulens 2021	Training novice robot surgeons: Proctoring provides same results as simulator-generated guidance	2021	10.1007/s11701-020-01118-y
Trinh 2021	Survival Analysis Using Surgeon Skill Metrics and Patient Factors to Predict Urinary Continence Recovery After Robot-assisted Radical Prostatectomy	2021	10.1016/j.euf.2021.04.001
Ebbing 2021	Development and validation of non-guided bladder-neck and neurovascular-bundle dissection modules of the RobotiX-Mentor full-procedure robotic-assisted radical prostatectomy virtual reality simulation	2021	10.1002/rcs.2195
Chen 2021	Surgical Outcomes, Technical Performance and Surgery Burden of Robotic Total Gastrectomy for Locally Advanced Gastric Cancer: A Prospective Study	2022	10.1097/SLA.0000000000004764
Liang 2014	Training the next generation of robotic surgeons using guided mentorship: A randomized controlled trial	2014	10.1016/j.jmig.2014.05.011
Havemann 2019	Examining validity evidence for a simulation-based assessment tool for basic robotic surgical skills	2019	10.1007/s11701-018-0811-8
GomezRuiz 2020	European expert consensus on a structured approach to training robotic-assisted low anterior resection using performance metrics	2020	10.1111/codi.15269
Gall 2020	Shortening surgical training through robotics: randomized clinical trial of laparoscopic versus robotic surgical learning curves	2020	10.1002/bjs5.50353
Moore 2015	Surgeons' display reduced mental effort and workload while performing robotically assisted surgical tasks, when compared to conventional laparoscopy	2015	10.1007/s00464-014-3967-y
Singh 2018	Robotic Surgery Improves Technical Performance and Enhances Prefrontal Activation During High Temporal Demand	2018	10.1007/s10439-018-2049-z
Wang 2018	Deep learning with convolutional neural network for objective skill evaluation in robot-assisted surgery	2018	10.1007/s11548-018-1860-1
Zihni 2018	Comparison of precision and speed in laparoscopic and robot-assisted surgical task performance	2018	10.1016/j.jss.2017.07.037
Ballouhey 2018	Comparison of 8 and 5 mm robotic instruments in small cavities: 5 or 8 mm robotic instruments for small cavities?	2018	10.1007/s00464-017-5781-9
Pimentel 2018	Does Previous Laparoscopic Experience Influence Basic Robotic Surgical Skills?	2017	10.1016/j.jsurg.2017.11.005
Kowalewski 2018	Skills in minimally invasive and open surgery show limited transferability to robotic surgery: results from a prospective study	2018	10.1007/s00464-018-6109-0
Davila 2018	Robotic skills can be aided by laparoscopic training	2018	10.1007/s00464-017-5963-5
Moglia 2018	Proficiency-based training of medical students using virtual simulators for laparoscopy and robot-assisted surgery: results of a pilot study	2018	10.1007/s13304-018-0559-8
Cox 2018	Validation of the Omni: A Novel, Multimodality, and Longitudinal Surgical Skills Assessment	2018	10.1016/j.jsurg.2018.10.012
Tarr 2019	Validation of a simulation model for robotic sacrocolpopexy	2022	10.1097/SPV.0000000000001054
Rice 2019	Crowdsourced Assessment of Inanimate Biotissue Drills: A Valid and Cost-Effective Way to Evaluate Surgical Trainees	2018	10.1016/j.jsurg.2018.10.007
Whittaker 2019	Validity assessment of a simulation module for robot-assisted thoracic lobectomy	2019	10.1177/0218492318813457
Lee 2014	Comparative assessment of physical and cognitive ergonomics associated with robotic and traditional laparoscopic surgeries	2014	10.1007/s00464-013-3213-z
Connolly 2014	Validation of a virtual reality-based robotic surgical skills curriculum	2014	10.1007/s00464-013-3373-x
Jarc 2015	Face, content, and construct validity of four, inanimate training exercises using the da Vinci Si surgical system configured with Single-Site TM instrumentation	2015	10.1007/s00464-014-3947-2
Finnerty 2016	General surgery training and robotics: Are residents improving their skills?	2016	10.1007/s00464-015-4240-8
Harbin 2017	Prior video game utilization is associated with improved performance on a robotic skills simulator	2016	10.1007/s11701-016-0657-x
Tam 2017	Robotic Pancreatoduodenectomy Biotissue Curriculum has Validity and Improves Technical Performance for Surgical Oncology Fellows	2017	10.1016/j.jsurg.2017.05.016
Mills 2017	Does Robotic Surgical Simulator Performance Correlate With Surgical Skill?	2017	10.1016/j.jsurg.2017.05.011
Kim 2017	Distraction and proficiency in laparoscopy: 2D versus robotic console 3D immersion	2017	10.1007/s00464-017-5525-x
Phe 2017	Outcomes of a virtual-reality simulator-training programme on basic surgical skills in robot-assisted laparoscopic surgery	2016	10.1002/rcs.1740
Jiang 2017	Evaluation of robotic surgery skills using dynamic time warping	2017	10.1016/j.cmpb.2017.09.007
Thomaier 2017	Laparoscopic and robotic skills are transferable in a simulation setting: a randomized controlled trial	2017	10.1007/s00464-016-5359-y
Orlando 2017	Retention of laparoscopic and robotic skills among medical students: a randomized controlled trial	2017	10.1007/s00464-016-5363-2
Dubin 2018	A Model for Predicting the GEARS Score from Virtual Reality Surgical Simulator Metrics	2018	10.1007/s00464-018-6082-7
Melich 2018	Rectal dissection simulator for da Vinci surgery: Details of simulator manufacturing with evidence of construct, face, and content validity	2018	10.1097/DCR.0000000000001044
Glassman 2014	Raven surgical robot training in preparation for da vinci	2014	10.3233/978-1-61499-375-9-135
Chowriappa 2015	Augmented-reality-based skills training for robot-assisted urethrovesical anastomosis: A multi-institutional randomised controlled trial	2015	10.1111/bju.12704
Meier 2016	Da VinciÂ© Skills SimulatorTM: is an early selection of talented console surgeons possible?	2016	10.1007/s11701-016-0616-6
Petz 2016	Structured training and competence assessment in colorectal robotic surgery. Results of a consensus experts round table	2016	10.1002/rcs.1731
Zihni 2016	Transfer and priming of surgical skills across minimally invasive surgical platforms	2016	10.1016/j.jss.2016.06.026
Newcomb 2017	Correlation of virtual reality simulation and dry lab robotic technical skills	2018	10.1016/j.jmig.2017.11.006
Ahmidi 2017	A Dataset and Benchmarks for Segmentation and Recognition of Gestures in Robotic Surgery	2017	10.1109/TBME.2016.2647680
Moore 2015	Robotic technology results in faster and more robust surgical skill acquisition than traditional laparoscopy	2015	10.1007/s11701-014-0493-9
Moore 2015	Robotically assisted laparoscopy benefits surgical performance under stress	2015	10.1007/s11701-015-0527-y
White 2015	Crowd-sourced assessment of technical skill: A valid method for discriminating basic robotic surgery skills	2015	10.1089/end.2015.0191
Willems 2016	A Comparison of Robotically Assisted Microsurgery versus Manual Microsurgery in Challenging Situations	2016	10.1097/PRS.0000000000002030
McVey 2016	Baseline Laparoscopic Skill May Predict Baseline Robotic Skill and Early Robotic Surgery Learning Curve	2016	10.1089/end.2015.0774
Kang 2012	A study on the learning curve of the robotic virtual reality simulator	2012	10.1089/lap.2011.0452
Panait 2014	Do laparoscopic skills transfer to robotic surgery?	2014	10.1016/j.jss.2013.10.014
Yoo 2015	Impact of laparoscopic experience on virtual robotic simulator dexterity	2015	10.4103/0972-9941.147696
Hassan 2015	Conventional laparoscopic vs robotic training: Which is better for Naive users? A randomized prospective crossover study	2015	10.1016/j.jsurg.2014.12.008
Gomez 2012	Construct validity of instrument vibrations as a measure of robotic surgical skill	2012	10.1007/s00464-015-4346-z
Goh 2012	Global evaluative assessment of robotic skills: validation of a clinical assessment tool to measure robotic surgical skills.	2012	10.1016/j.juro.2011.09.032
Hung 2012	Validation of a novel robotic-assisted partial nephrectomy surgical training model.	2012	10.1111/j.1464-410X.2012.10953.x
Dulan 2012	Content and face validity of a comprehensive robotic skills training program for general surgery, urology, and gynecology.	2012	10.1016/j.amjsurg.2011.09.021
Arain 2012	Comprehensive proficiency-based inanimate training for robotic surgery: reliability, feasibility, and educational benefit.	2012	10.1007/s00464-012-2264-x
Tausch 2012	Content and construct validation of a robotic surgery curriculum using an electromagnetic instrument tracker.	2012	10.1016/j.juro.2012.05.005
Liss 2012	Validation, correlation, and comparison of the da Vinci trainer( TM) and the daVinci surgical skills simulator( TM) using the Mimic( TM) software for urologic robotic surgical education.	2012	10.1089/end.2012.0328
Teishima 2012	Impact of laparoscopic experience on the proficiency gain of urologic surgeons in robot-assisted surgery.	2012	10.1089/end.2012.0308
Dulan 2012	Developing a comprehensive, proficiency-based training program for robotic surgery.	2012	10.1016/j.surg.2012.07.028
Jenison 2012	Robotic surgical skills: acquisition, maintenance, and degradation.	2012	10.4293/108680812X13427982376185
Menhadji 2013	Tracking and assessment of technical skills acquisition among urology residents for open, laparoscopic, and robotic skills over 4 years: is there a trend?.	2013	10.1089/end.2012.0633
Lyons 2013	Which skills really matter? proving face, content, and construct validity for a commercial robotic simulator.	2013	10.1007/s00464-012-2704-7
Hung 2013	Comparative assessment of three standardized robotic surgery training methods.	2013	10.1111/bju.12045
Stegemann 2013	Fundamental skills of robotic surgery: a multi-institutional randomized controlled trial for validation of a simulation-based curriculum.	2013	10.1016/j.urology.2012.12.033
Angell 2013	Contribution of laparoscopic training to robotic proficiency.	2013	10.1089/end.2013.0082
Lendvay 2013	Virtual reality robotic surgery warm-up improves task performance in a dry laboratory environment: a prospective randomized controlled study.	2013	10.1016/j.jamcollsurg.2013.02.012
Ramos 2014	Face, content, construct and concurrent validity of dry laboratory exercises for robotic training using a global assessment tool.	2014	10.1111/bju.12559
Culligan 2014	Predictive validity of a training protocol using a robotic surgery simulator.	2014	10.1097/SPV.0000000000000045
Cundy 2014	Experience related factors compensate for haptic loss in robot-assisted laparoscopic surgery.	2014	10.1089/end.2013.0671
Sheth 2014	Virtual reality robotic surgical simulation: an analysis of gynecology trainees.	2014	10.1016/j.jsurg.2013.06.009
Chen 2014	Crowd-Sourced Assessment of Technical Skills: a novel method to evaluate surgical performance.	2014	10.1016/j.jss.2013.09.024
Ruparel 2014	Assessment of virtual reality robotic simulation performance by urology resident trainees.	2014	10.1016/j.jsurg.2013.09.009
Siddiqui 2014	Validity and reliability of the robotic Objective Structured Assessment of Technical Skills.	2014	10.1097/AOG.0000000000000288
Kang 2014	The Tube 3 module designed for practicing vesicourethral anastomosis in a virtual reality robotic simulator: determination of face, content, and construct validity.	2014	10.1016/j.urology.2014.05.005
Holst 2015	Crowd-sourced assessment of technical skills: an adjunct to urology resident surgical simulation training.	2015	10.1089/end.2014.0616
Shin 2015	A novel interface for the telementoring of robotic surgery.	2015	10.1111/bju.12985
Raza 2015	Surgical competency for urethrovesical anastomosis during robot-assisted radical prostatectomy: development and validation of the robotic anastomosis competency evaluation.	2015	10.1016/j.urology.2014.09.017
Whitehurst 2015	Comparison of two simulation systems to support robotic-assisted surgical training: a pilot study (Swine model).	2015	10.1016/j.jmig.2014.12.160
Hung 2015	Development and Validation of a Novel Robotic Procedure Specific Simulation Platform: Partial Nephrectomy.	2015	10.1016/j.juro.2015.02.2949
Holst 2015	Crowd-Sourced Assessment of Technical Skills: Differentiating Animate Surgical Skill Through the Wisdom of Crowds.	2015	10.1089/end.2015.0104
Liss 2015	Virtual reality suturing task as an objective test for robotic experience assessment.	2015	10.1186/s12894-015-0051-4
Goh 2015	Multi-Institutional Validation of Fundamental Inanimate Robotic Skills Tasks.	2015	10.1016/j.juro.2015.04.125
Kiely 2015	Virtual reality robotic surgery simulation curriculum to teach robotic suturing: a randomized controlled trial.	2015	10.1007/s11701-015-0513-4
Kim 2015	Concurrent and predictive validation of robotic simulator Tube 3 module.	2015	10.4111/kju.2015.56.11.756
Yang 2015	Manual Ambidexterity Predicts Robotic Surgical Proficiency.	2015	10.1089/lap.2015.0288
Volpe 2015	Pilot Validation Study of the European Association of Urology Robotic Training Curriculum.	2015	10.1016/j.eururo.2014.10.025
Elhage 2015	An assessment of the physical impact of complex surgical tasks on surgeon errors and discomfort: a comparison between robot-assisted, laparoscopic and open approaches.	2015	10.1111/bju.12680
Rossitto 2016	Learning a new robotic surgical device: Telelap Alf X in gynaecological surgery.	2016	10.1002/rcs.1672
DalMoro 2016	Scoring surgical skill in robotic prostatectomy as adherence to the surgical plan: proposal for a new tool (ScAPSA).	2016	PMID: 26354613
Powers 2016	Crowdsourcing Assessment of Surgeon Dissection of Renal Artery and Vein During Robotic Partial Nephrectomy: A Novel Approach for Quantitative Assessment of Surgical Performance.	2016	10.1089/end.2015.0665
Ghani 2016	Measuring to Improve: Peer and Crowd-sourced Assessments of Technical Skill with Robot-assisted Radical Prostatectomy.	2016	10.1016/j.eururo.2015.11.028
Noureldin 2016	Incorporation of the da Vinci Surgical Skills Simulator at urology Objective Structured Clinical Examinations (OSCEs): a pilot study.	2016	PMID: 26892058
Vedula 2016	Task-Level vs. Segment-Level Quantitative Metrics for Surgical Skill Assessment.	2016	10.1016/j.jsurg.2015.11.009
Teishima 2016	Effect of Spatial Cognitive Ability on Gain in Robot-Assisted Surgical Skills of Urological Surgeons.	2016	10.1016/j.jsurg.2016.02.009
Aghazadeh 2016	Performance of robotic simulated skills tasks is positively associated with clinical robotic surgical performance.	2016	10.1111/bju.13511
Stefanidis 2016	Developing a coaching mechanism for practicing surgeons.	2016	10.1016/j.surg.2016.03.036
Polin 2016	Crowdsourcing: a valid alternative to expert evaluation of robotic surgery skills.	2016	10.1016/j.ajog.2016.06.033
Whittaker 2016	Validation of the RobotiX Mentor Robotic Surgery Simulator.	2016	10.1089/end.2015.0620
Lovegrove 2016	Structured and Modular Training Pathway for Robot-assisted Radical Prostatectomy (RARP): Validation of the RARP Assessment Score and Learning Curve Assessment.	2016	10.1016/j.eururo.2015.10.048
Hung 2017	Structured learning for robotic surgery utilizing a proficiency score: a pilot study.	2017	10.1007/s00345-016-1833-3
Schommer 2017	Diffusion of Robotic Technology Into Urologic Practice has Led to Improved Resident Physician Robotic Skills.	2017	10.1016/j.jsurg.2016.06.006
Vernez 2017	C-SATS: Assessing Surgical Skills Among Urology Residency Applicants.	2017	10.1089/end.2016.0569
Frederick 2017	Surgical Competency for Robot-Assisted Hysterectomy: Development and Validation of a Robotic Hysterectomy Assessment Score (RHAS).	2017	10.1016/j.jmig.2016.10.004
Hussein 2017	Development and Validation of an Objective Scoring Tool for Robot-Assisted Radical Prostatectomy: Prostatectomy Assessment and Competency Evaluation.	2017	10.1016/j.juro.2016.11.100
Lovegrove 2017	Modular Training for Robot-Assisted Radical Prostatectomy: Where to Begin?.	2017	10.1016/j.jsurg.2016.11.002
Vargas 2017	Transferability of Virtual Reality, Simulation-Based, Robotic Suturing Skills to a Live Porcine Model in Novice Surgeons: A Single-Blind Randomized Controlled Trial.	2017	10.1016/j.jmig.2016.12.016
Talasaz 2017	The Role of Direct and Visual Force Feedback in Suturing Using a 7-DOF Dual-Arm Teleoperated System.	2017	10.1109/TOH.2016.2616874
Goldenberg 2017	Surgeon Performance Predicts Early Continence After Robot-Assisted Radical Prostatectomy.	2017	10.1089/end.2017.0284
Fard 2018	Automated robot-assisted surgical skill evaluation: Predictive analytics approach.	2018	10.1002/rcs.1850
Choussein 2018	Robotic Assistance Confers Ambidexterity to Laparoscopic Surgeons.	2017	10.1016/j.jmig.2017.07.010
Hung 2018	Development and Validation of Objective Performance Metrics for Robot-Assisted Radical Prostatectomy: A Pilot Study.	2018	10.1016/j.juro.2017.07.081
Altok 2018	A decade of robot-assisted radical prostatectomy training: Time-based metrics and qualitative grading for fellows and residents.	2017	10.1016/j.urolonc.2017.08.028
Harrison 2018	The Validation of a Novel Robot-Assisted Radical Prostatectomy Virtual Reality Module.	2017	10.1016/j.jsurg.2017.09.005
Hoogenes 2018	A Randomized Comparison of 2 Robotic Virtual Reality Simulators and Evaluation of Trainees' Skills Transfer to a Simulated Robotic Urethrovesical Anastomosis Task.	2018	10.1016/j.urology.2017.09.023
Rusch 2018	The Society of European Robotic Gynaecological Surgery (SERGS) Pilot Curriculum for robot assisted gynecological surgery.	2018	10.1007/s00404-017-4612-5
Hinchcliff 2018	Visuospatial Aptitude Testing Differentially Predicts Simulated Surgical Skill.	2018	10.1016/j.jmig.2018.01.031
Monda 2018	Development and Validity of a Silicone Renal Tumor Model for Robotic Partial Nephrectomy Training.	2018	0.1016/j.urology.2018.01.030
Zia 2018	Automated surgical skill assessment in RMIS training.	2018	10.1007/s11548-018-1735-5
Hovgaard 2018	Validity evidence for procedural competency in virtual reality robotic simulation, establishing a credible pass/fail standard for the vaginal cuff closure procedure.	2018	10.1007/s00464-018-6165-5
Oh 2018	Crowdsourced versus expert evaluations of the vesico-urethral anastomosis in the robotic radical prostatectomy: is one superior at discriminating differences in automated performance metrics?.	2018	10.1007/s11701-018-0814-5
Chen 2018	Use of Automated Performance Metrics to Measure Surgeon Performance during Robotic Vesicourethral Anastomosis and Methodical Development of a Training Tutorial.	2018	10.1016/j.juro.2018.05.080
vonRundstedt 2018	Validation of a Simulation-training Model for Robotic Intracorporeal Bowel Anastomosis Using a Step-by-step Technique.	2018	10.1016/j.urology.2018.07.035
Guni 2018	Development of a technical checklist for the assessment of suturing in robotic surgery.	2018	10.1007/s00464-018-6407-6
Goldenberg 2019	A Novel Method of Setting Performance Standards in Surgery Using Patient Outcomes.	2019	10.1097/SLA.0000000000002562
Hutchins 2019	Objective Assessment of the Early Stages of the Learning Curve for the Senhance Surgical Robotic System.	2019	10.1016/j.jsurg.2018.06.026
Hung 2019	Experts vs super-experts: differences in automated performance metrics and clinical outcomes for robot-assisted radical prostatectomy.	2019	10.1111/bju.14599
Baghdadi 2019	A computer vision technique for automated assessment of surgical performance using surgeons' console-feed videos.	2019	10.1007/s11548-018-1881-9
Busch 2019	Objective assessment of robotic suturing skills with a new computerized system: A step forward in the training of robotic surgeons.	2019	10.1111/ases.12672
Beulens 2019	Linking surgical skills to postoperative outcomes: a Delphi study on the robot-assisted radical prostatectomy.	2019	10.1007/s11701-018-00916-9
Johnson 2019	Design and Validation of a Low-Cost, High-Fidelity Model for Urethrovesical Anastomosis in Radical Prostatectomy.	2019	10.1089/end.2018.0871
Luko 2020	An Efficient Single-session Spatial Skill Trainer for Robot-assisted Surgery: A Randomized Trial.	2019	10.1016/j.jmig.2019.05.014
Witthaus 2020	Incorporation and validation of clinically relevant performance metrics of simulation (CRPMS) into a novel full-immersion simulation platform for nerve-sparing robot-assisted radical prostatectomy (NS-RARP) utilizing three-dimensional printing and hydroge	2020	10.1111/bju.14940
Leijte 2020	Robot assisted versus laparoscopic suturing learning curve in a simulated setting.	2020	10.1007/s00464-019-07263-2
Dilley 2020	Visual behaviour in robotic surgery-Demonstrating the validity of the simulated environment.	2020	10.1002/rcs.2075
Moller 2020	Laparoscopic Versus Robotic-assisted Suturing Performance Among Novice Surgeons: A Blinded, Cross-Over Study.	2020	10.1097/SLE.0000000000000766
Timberlake 2020	Design and validation of a low-cost, high-fidelity model for robotic pyeloplasty simulation training.	2020	10.1016/j.jpurol.2020.02.003
Bendre 2020	Robotic dismembered pyeloplasty surgical simulation using a 3D-printed silicone-based model: development, face validation and crowdsourced learning outcomes assessment.	2020	10.1007/s11701-020-01072-9
Margueritte 2020	Description of an initiation program to robotic in vivo gynecological surgery for junior surgeons.	2020	10.1016/j.jogoh.2019.101627
Onofrio 2020	A methodology for Dynamic Human Reliability Analysis in Robotic Surgery.	2020	10.1016/j.apergo.2020.103150
Leijte 2020	Assessment of validity evidence for the RobotiX robot assisted surgery simulator on advanced suturing tasks.	2020	10.1186/s12893-020-00839-z
Lefor 2020	Motion analysis of the JHU-ISI Gesture and Skill Assessment Working Set using Robotics Video and Motion Assessment Software.	2020	10.1007/s11548-020-02259-z
Puliatti 2021	Development and validation of the objective assessment of robotic suturing and knot tying skills for chicken anastomotic model.	2021	10.1007/s00464-020-07918-5
Ghazi 2021	Multi-institutional validation of a perfused robot-assisted partial nephrectomy procedural simulation platform utilizing clinically relevant objective metrics of simulators (CROMS).	2021	10.1111/bju.15246
Addison 2021	Correlation between operative time and crowd-sourced skills assessment for robotic bariatric surgery.	2021	10.1007/s00464-020-08019-z
Ma 2021	A Novel Dissection Gesture Classification to Characterize Robotic Dissection Technique for Renal Hilar Dissection.	2021	10.1097/JU.0000000000001328
Klapczynski 2021	Training for next generation surgeons: a pilot study of robot-assisted hysterectomy managed by resident using dual console.	2020	10.1007/s00404-020-05870-2
Chow 2021	Ex Vivo Porcine Model for Robot-Assisted Partial Nephrectomy Simulation at a High-Volume Tertiary Center: Resident Perception and Validation Assessment Using the Global Evaluative Assessment of Robotic Skills Tool.	2021	10.1089/end.2020.0590
Yu 2021	Quantifying the "Assistant Effect" in Robotic-Assisted Radical Prostatectomy (RARP): Measures of Technical Performance.	2021	10.1016/j.jss.2020.11.037
Olsen 2021	Validation of a Novel Simulation-Based Test in Robot-Assisted Radical Prostatectomy.	2021	10.1089/end.2020.0986
Lefor 2021	Motion analysis of the JHU-ISI Gesture and Skill Assessment Working Set II: learning curve analysis.	2021	10.1007/s11548-021-02339-8
Turner 2021	Mapping the robotic hysterectomy learning curve and re-establishing surgical training metrics.	2021	10.3802/jgo.2021.32.e58
Mottrie 2021	Objective assessment of intraoperative skills for robot-assisted radical prostatectomy (RARP): results from the ERUS Scientific and Educational Working Groups Metrics Initiative.	2021	10.1111/bju.15311
Crisostomo-Wynne 2021	Comparison of Robotic Surgery Video Quality Between YouTube and Curated Sources Using GEARS Criteria.	2021	10.1016/j.urology.2021.04.005
Voskens 2022	Endoscopic surgery suturing techniques: a randomized study on learning.	2022	10.1186/s12893-022-01513-2
Sanford 2022	Technical Skill Impacts the Success of Sequential Robotic Suturing Substeps.	2022	10.1089/end.2021.0417
Berges 2022	Virtual Reality Simulation Has Weak Correlation with Overall Trainee Robot-Assisted Laparoscopic Hysterectomy Performance.	2022	10.1016/j.jmig.2021.12.002
Cope 2022	Surgical Science-Simbionix Robotic Hysterectomy Simulator: Validating a New Tool.	2022	10.1016/j.jmig.2022.01.016
